# Supplementary material for: Bioinformatics Analysis Reveals an Association Between Cancer Cell Stemness, Gene Mutations, and the Immune Microenvironment in Stomach Adenocarcinoma
Source: Front Genet. 2020 Dec 11;11:595477. doi: 10.3389/fgene.2020.595477 (PMC7759681; doi:10.3389/fgene.2020.595477)
Supplement: Supplementary file 3 [file Table_3.XLSX]

## Sheet: Sheet1
Supplementary table 3: The enriched genes in brown and blue co-expression modules and corresponding mRNAsi, EREG-mRNAsi, and module membership.
probes	moduleColor	GS.mRNAsi	p.GS.mRNAsi	GS.EREG-mRNAsi	p.GS.EREG-mRNAsi	MM	p.MM
BUB1	brown	0.681028	1.92e-46	0.377797	1.14e-12	0.868909	1.66e-102
BUB1B	brown	0.66782	4.23e-44	0.347065	8.39e-11	0.853387	4.24e-95
KIF14	brown	0.598418	1.55e-33	0.279047	2.46e-07	0.847742	1.29e-92
NCAPH	brown	0.698002	1.21e-49	0.430086	2.46e-16	0.842511	2.11e-90
RACGAP1	brown	0.661903	4.34e-43	0.327756	9.96e-10	0.839474	3.74e-89
KIF15	brown	0.649318	5.17e-41	0.318116	3.22e-09	0.832169	2.96e-86
CENPF	brown	0.579655	4.21e-31	0.267947	7.53e-07	0.82223	1.58e-82
TPX2	brown	0.596884	2.49e-33	0.299611	2.72e-08	0.819512	1.5e-81
RAD54L	brown	0.653031	1.29e-41	0.319834	2.62e-09	0.819315	1.77e-81
KIF18B	brown	0.61587	6.04e-36	0.271205	5.45e-07	0.816928	1.24e-80
KIF4A	brown	0.609949	4.13e-35	0.327344	1.05e-09	0.814498	8.71e-80
TTK	brown	0.631215	3.41e-38	0.361852	1.12e-11	0.813221	2.4e-79
SGO2	brown	0.539767	2.01e-26	0.288791	8.86e-08	0.812457	4.39e-79
PLK4	brown	0.679548	3.56e-46	0.313988	5.24e-09	0.810158	2.65e-78
ARHGAP11A	brown	0.658834	1.42e-42	0.374215	1.92e-12	0.809605	4.07e-78
XRCC2	brown	0.586397	5.86e-32	0.242227	8.32e-06	0.804385	2.18e-76
C1orf112	brown	0.528899	2.98e-25	0.282063	1.8e-07	0.803481	4.29e-76
NCAPG	brown	0.710703	3.45e-52	0.397629	5.51e-14	0.802999	6.15e-76
ORC6	brown	0.668144	3.72e-44	0.327032	1.09e-09	0.801505	1.86e-75
CLIP3	blue	-0.726743	1.32e-55	-0.49597	5.92e-22	0.964214	9.44e-192
RNF150	blue	-0.684783	3.92e-47	-0.470782	1.16e-19	0.958988	3.35e-182
MRVI1	blue	-0.745325	6.97e-60	-0.429188	2.88e-16	0.951129	5.83e-170
NEGR1	blue	-0.685854	2.49e-47	-0.439732	4.39e-17	0.947435	6.89e-165
KANK2	blue	-0.716064	2.64e-53	-0.41603	2.76e-15	0.947072	2.07e-164
ARHGEF25	blue	-0.704544	6.16e-51	-0.450979	5.49e-18	0.944171	1.06e-160
MRGPRF	blue	-0.685387	3.03e-47	-0.438285	5.71e-17	0.943701	4.03e-160
TNS1	blue	-0.690464	3.4e-48	-0.406342	1.37e-14	0.942693	6.85e-159
STON1	blue	-0.714312	6.17e-53	-0.424866	6.12e-16	0.94185	7.06e-158
PGM5	blue	-0.603212	3.5e-34	-0.436745	7.54e-17	0.940953	8.12e-157
PDLIM3	blue	-0.707613	1.48e-51	-0.422324	9.48e-16	0.937857	2.81e-153
GPRASP1	blue	-0.693705	8.21e-49	-0.480096	1.74e-20	0.937458	7.79e-153
FERMT2	blue	-0.705673	3.65e-51	-0.43111	2.06e-16	0.937088	1.99e-152
RGMA	blue	-0.693807	7.85e-49	-0.449776	6.88e-18	0.935044	3.22e-150
LMOD1	blue	-0.616368	5.13e-36	-0.439439	4.64e-17	0.93417	2.7e-149
ACTA2	blue	-0.699342	6.62e-50	-0.452854	3.85e-18	0.933935	4.76e-149
PRICKLE2	blue	-0.692983	1.13e-48	-0.449624	7.08e-18	0.933028	4.16e-148
MSRB3	blue	-0.688872	6.79e-48	-0.420221	1.36e-15	0.933008	4.35e-148
SPARCL1	blue	-0.71816	9.53e-54	-0.43696	7.25e-17	0.932934	5.19e-148
KCNMA1	blue	-0.615705	6.37e-36	-0.413547	4.18e-15	0.931272	2.53e-146
TGFB1I1	blue	-0.724643	3.82e-55	-0.461495	7.31e-19	0.929891	5.95e-145
JPH2	blue	-0.630825	3.91e-38	-0.42075	1.24e-15	0.928956	4.86e-144
ASB2	blue	-0.613837	1.17e-35	-0.465786	3.15e-19	0.928087	3.34e-143
MYLK	blue	-0.613323	1.39e-35	-0.436273	8.21e-17	0.927561	1.06e-142
LIMS2	blue	-0.65935	1.17e-42	-0.476485	3.65e-20	0.926853	4.94e-142
FLNA	blue	-0.621183	1.04e-36	-0.425971	5.06e-16	0.924573	6.35e-140
TMEM35A	blue	-0.606078	1.42e-34	-0.450184	6.38e-18	0.924276	1.18e-139
PDZD4	blue	-0.662887	2.96e-43	-0.456202	2.03e-18	0.924045	1.91e-139
DACT3	blue	-0.689382	5.44e-48	-0.41717	2.28e-15	0.923597	4.85e-139
PDZRN4	blue	-0.589007	2.7e-32	-0.415005	3.27e-15	0.923272	9.49e-139
DIXDC1	blue	-0.648347	7.41e-41	-0.407547	1.12e-14	0.923269	9.55e-139
SORBS1	blue	-0.606049	1.43e-34	-0.414017	3.86e-15	0.922399	5.67e-138
AP003071.3	blue	-0.667645	4.53e-44	-0.421964	1.01e-15	0.921135	7.27e-137
RBPMS2	blue	-0.603255	3.45e-34	-0.460322	9.19e-19	0.919183	3.43e-135
CCDC69	blue	-0.64506	2.48e-40	-0.482546	1.04e-20	0.918531	1.22e-134
MAGI2	blue	-0.708811	8.43e-52	-0.433603	1.32e-16	0.918503	1.29e-134
BHMT2	blue	-0.720257	3.4e-54	-0.42349	7.76e-16	0.918441	1.45e-134
AP001107.5	blue	-0.610887	3.05e-35	-0.468629	1.79e-19	0.918152	2.54e-134
ADAMTS9-AS2	blue	-0.658347	1.72e-42	-0.44133	3.29e-17	0.917825	4.75e-134
ITGA7	blue	-0.640724	1.19e-39	-0.414062	3.83e-15	0.917459	9.57e-134
TAGLN	blue	-0.661937	4.28e-43	-0.430272	2.38e-16	0.915435	4.34e-132
SPEG	blue	-0.590944	1.51e-32	-0.431275	2e-16	0.915067	8.58e-132
FRRS1L	blue	-0.58748	4.25e-32	-0.436515	7.86e-17	0.914798	1.41e-131
TMOD1	blue	-0.628143	9.85e-38	-0.390442	1.69e-13	0.914258	3.81e-131
FBXL22	blue	-0.608029	7.63e-35	-0.444976	1.68e-17	0.91423	4.02e-131
EPM2A	blue	-0.571055	4.87e-30	-0.448364	8.96e-18	0.913111	3.08e-130
KCNMB1	blue	-0.619069	2.1e-36	-0.465127	3.59e-19	0.911491	5.6e-129
AOC3	blue	-0.700687	3.6e-50	-0.37046	3.31e-12	0.910537	3.01e-128
MYH11	blue	-0.566468	1.74e-29	-0.40856	9.51e-15	0.910001	7.69e-128
SSBP2	blue	-0.717729	1.18e-53	-0.502044	1.55e-22	0.909765	1.16e-127
ANGPTL1	blue	-0.603814	2.9e-34	-0.411825	5.56e-15	0.909542	1.71e-127
AP003071.4	blue	-0.653349	1.15e-41	-0.431453	1.94e-16	0.9095	1.84e-127
FENDRR	blue	-0.683901	5.71e-47	-0.439157	4.88e-17	0.909254	2.81e-127
HAND2	blue	-0.630956	3.73e-38	-0.413507	4.2e-15	0.907621	4.6e-126
SSC5D	blue	-0.759849	1.71e-63	-0.428236	3.41e-16	0.906644	2.39e-125
CPED1	blue	-0.656252	3.82e-42	-0.381348	6.72e-13	0.906071	6.22e-125
MYL9	blue	-0.620031	1.53e-36	-0.444434	1.86e-17	0.905955	7.55e-125
EML1	blue	-0.710047	4.71e-52	-0.410084	7.41e-15	0.905466	1.7e-124
METTL24	blue	-0.609566	4.67e-35	-0.380982	7.09e-13	0.904559	7.57e-124
CSRP1	blue	-0.598393	1.57e-33	-0.436489	7.89e-17	0.904499	8.35e-124
SVIL	blue	-0.60998	4.09e-35	-0.402078	2.72e-14	0.904297	1.16e-123
DNAJB5	blue	-0.5928	8.64e-33	-0.429051	2.95e-16	0.903938	2.08e-123
FOXP2	blue	-0.634624	1.04e-38	-0.426714	4.44e-16	0.903871	2.33e-123
FHL1	blue	-0.598796	1.38e-33	-0.420797	1.23e-15	0.902477	2.2e-122
SMTN	blue	-0.577943	6.89e-31	-0.435832	8.88e-17	0.901559	9.52e-122
GRIK5	blue	-0.61688	4.33e-36	-0.427405	3.94e-16	0.90119	1.71e-121
HSPB8	blue	-0.607408	9.3e-35	-0.447107	1.13e-17	0.901025	2.22e-121
CBX7	blue	-0.654989	6.17e-42	-0.461488	7.32e-19	0.900673	3.86e-121
C8orf88	blue	-0.588512	3.13e-32	-0.410736	6.65e-15	0.899524	2.32e-120
PYGM	blue	-0.568279	1.06e-29	-0.435224	9.9e-17	0.898576	1e-119
MYOCD	blue	-0.615638	6.51e-36	-0.406478	1.34e-14	0.897689	3.89e-119
CHRM2	blue	-0.589092	2.63e-32	-0.395232	8.04e-14	0.897428	5.78e-119
JAM2	blue	-0.765433	5.94e-65	-0.419781	1.46e-15	0.896298	3.18e-118
FILIP1	blue	-0.605464	1.72e-34	-0.397913	5.27e-14	0.894289	6.3e-117
FOXF1	blue	-0.722023	1.42e-54	-0.417566	2.13e-15	0.894232	6.84e-117
DMD	blue	-0.577436	7.97e-31	-0.373056	2.28e-12	0.894121	8.05e-117
ANK2	blue	-0.651547	2.25e-41	-0.417814	2.04e-15	0.894056	8.86e-117
HSPB6	blue	-0.565925	2.03e-29	-0.449625	7.08e-18	0.89393	1.07e-116
PPP1R12B	blue	-0.581955	2.16e-31	-0.404667	1.79e-14	0.893737	1.41e-116
AC096745.2	blue	-0.594446	5.25e-33	-0.430116	2.45e-16	0.893141	3.37e-116
PRUNE2	blue	-0.573798	2.25e-30	-0.382364	5.77e-13	0.892597	7.42e-116
AP000892.3	blue	-0.61548	6.86e-36	-0.40206	2.73e-14	0.892412	9.69e-116
PLN	blue	-0.598648	1.45e-33	-0.391831	1.36e-13	0.891865	2.13e-115
JAM3	blue	-0.714386	5.95e-53	-0.378107	1.09e-12	0.891505	3.57e-115
NACAD	blue	-0.697419	1.57e-49	-0.413407	4.27e-15	0.891126	6.13e-115
ATP1A2	blue	-0.544284	6.38e-27	-0.39931	4.23e-14	0.890237	2.16e-114
BVES	blue	-0.58401	1.18e-31	-0.416254	2.66e-15	0.890236	2.17e-114
PRKN	blue	-0.609673	4.51e-35	-0.400455	3.52e-14	0.889965	3.18e-114
PGR	blue	-0.653344	1.15e-41	-0.406863	1.25e-14	0.889546	5.72e-114
FAM129A	blue	-0.589929	2.05e-32	-0.417011	2.34e-15	0.889393	7.1e-114
ADAM33	blue	-0.691668	2.01e-48	-0.396007	7.12e-14	0.888071	4.47e-113
BARX1	blue	-0.61771	3.3e-36	-0.439688	4.43e-17	0.887451	1.05e-112
MIR1-1HG-AS1	blue	-0.533601	9.39e-26	-0.426588	4.54e-16	0.887286	1.32e-112
BARX1-DT	blue	-0.602369	4.56e-34	-0.450622	5.87e-18	0.886325	4.91e-112
CACNA1H	blue	-0.608391	6.8e-35	-0.369834	3.63e-12	0.885832	9.58e-112
PKNOX2	blue	-0.723672	6.22e-55	-0.435482	9.46e-17	0.885124	2.49e-111
TACR2	blue	-0.561016	7.75e-29	-0.438977	5.04e-17	0.884691	4.46e-111
RAB9B	blue	-0.57687	9.37e-31	-0.41636	2.61e-15	0.884193	8.68e-111
PRIMA1	blue	-0.551377	1.01e-27	-0.413734	4.05e-15	0.884032	1.08e-110
PSD	blue	-0.580739	3.07e-31	-0.419912	1.43e-15	0.883605	1.9e-110
MIR100HG	blue	-0.734906	1.93e-57	-0.43693	7.29e-17	0.883419	2.43e-110
ADCY5	blue	-0.623706	4.45e-37	-0.400044	3.76e-14	0.882179	1.24e-109
AF001548.1	blue	-0.55657	2.56e-28	-0.402683	2.47e-14	0.88171	2.3e-109
DMPK	blue	-0.591837	1.16e-32	-0.443937	2.04e-17	0.881077	5.23e-109
ROR2	blue	-0.698003	1.21e-49	-0.414343	3.66e-15	0.880968	6.02e-109
NKAPL	blue	-0.623875	4.21e-37	-0.430873	2.14e-16	0.880559	1.02e-108
FAXDC2	blue	-0.635604	7.36e-39	-0.427168	4.11e-16	0.880518	1.08e-108
CFL2	blue	-0.575616	1.34e-30	-0.427015	4.22e-16	0.880279	1.47e-108
PALLD	blue	-0.630332	4.63e-38	-0.397731	5.43e-14	0.880249	1.53e-108
DAAM2	blue	-0.696729	2.14e-49	-0.415138	3.2e-15	0.880176	1.68e-108
RERG	blue	-0.695532	3.65e-49	-0.411325	6.04e-15	0.879951	2.24e-108
TPM1	blue	-0.583757	1.28e-31	-0.405897	1.47e-14	0.879667	3.22e-108
TPM2	blue	-0.588737	2.93e-32	-0.438077	5.93e-17	0.879601	3.51e-108
NCS1	blue	-0.579554	4.33e-31	-0.415336	3.1e-15	0.87952	3.89e-108
ARHGEF26	blue	-0.542482	1.01e-26	-0.402027	2.74e-14	0.878821	9.47e-108
AC002398.2	blue	-0.604047	2.69e-34	-0.454033	3.08e-18	0.878137	2.25e-107
AKAP6	blue	-0.57034	5.95e-30	-0.399906	3.84e-14	0.877797	3.46e-107
NECAB1	blue	-0.57775	7.28e-31	-0.463974	4.5e-19	0.877185	7.47e-107
GNAO1	blue	-0.598768	1.4e-33	-0.388196	2.39e-13	0.876014	3.21e-106
LDB3	blue	-0.526521	5.3e-25	-0.411962	5.43e-15	0.875738	4.52e-106
PLEKHO1	blue	-0.653046	1.29e-41	-0.527039	4.68e-25	0.87517	9.12e-106
PRELP	blue	-0.740556	9.45e-59	-0.407314	1.17e-14	0.874821	1.4e-105
SYNC	blue	-0.654008	8.94e-42	-0.365472	6.75e-12	0.87466	1.71e-105
HAND2-AS1	blue	-0.54646	3.65e-27	-0.416115	2.72e-15	0.874062	3.55e-105
MXRA7	blue	-0.6866	1.81e-47	-0.414752	3.42e-15	0.873085	1.16e-104
C14orf132	blue	-0.667477	4.85e-44	-0.39024	1.74e-13	0.871708	6.08e-104
SYNM	blue	-0.52445	8.73e-25	-0.38331	5.01e-13	0.869996	4.64e-103
DES	blue	-0.567538	1.3e-29	-0.407626	1.11e-14	0.869198	1.19e-102
CNN1	blue	-0.55116	1.07e-27	-0.421585	1.08e-15	0.869038	1.43e-102
FLNC	blue	-0.549176	1.8e-27	-0.385379	3.66e-13	0.868379	3.08e-102
ITIH5	blue	-0.673289	4.68e-45	-0.398959	4.47e-14	0.868286	3.43e-102
MAP6	blue	-0.622693	6.26e-37	-0.435961	8.68e-17	0.86813	4.12e-102
CRYAB	blue	-0.675029	2.3e-45	-0.4369	7.33e-17	0.867873	5.54e-102
TCEAL7	blue	-0.77177	1.17e-66	-0.418737	1.75e-15	0.867382	9.78e-102
TMEM100	blue	-0.613201	1.44e-35	-0.38443	4.23e-13	0.865274	1.09e-100
ANGPTL7	blue	-0.597678	1.95e-33	-0.391319	1.48e-13	0.864338	3.14e-100
HSPB7	blue	-0.595256	4.1e-33	-0.413444	4.25e-15	0.860025	3.71e-98
FXYD6	blue	-0.695641	3.48e-49	-0.403161	2.28e-14	0.858615	1.7e-97
FBXL7	blue	-0.789888	7.54e-72	-0.364513	7.73e-12	0.858082	3.02e-97
SETBP1	blue	-0.702754	1.4e-50	-0.428454	3.28e-16	0.857164	8.05e-97
ADHFE1	blue	-0.586481	5.72e-32	-0.498158	3.67e-22	0.854903	8.76e-96
SLC2A4	blue	-0.503075	1.23e-22	-0.396121	6.99e-14	0.854607	1.19e-95
NDN	blue	-0.784358	3.28e-70	-0.395355	7.88e-14	0.854474	1.37e-95
AL513217.1	blue	-0.530016	2.27e-25	-0.430088	2.46e-16	0.854091	2.04e-95
DNAJC18	blue	-0.703646	9.31e-51	-0.437237	6.9e-17	0.853736	2.95e-95
SYNPO2	blue	-0.540522	1.66e-26	-0.383878	4.59e-13	0.852707	8.54e-95
CAND2	blue	-0.594447	5.24e-33	-0.371013	3.06e-12	0.851637	2.56e-94
NEXN	blue	-0.598317	1.6e-33	-0.441708	3.07e-17	0.851503	2.93e-94
SCN7A	blue	-0.608088	7.49e-35	-0.357905	1.94e-11	0.850797	6.02e-94
CNKSR2	blue	-0.548464	2.17e-27	-0.402447	2.56e-14	0.850772	6.18e-94
ZFPM2	blue	-0.754052	5.05e-62	-0.445434	1.55e-17	0.850638	7.07e-94
KCNB1	blue	-0.539375	2.22e-26	-0.396288	6.81e-14	0.847938	1.06e-92
ACTG2	blue	-0.538293	2.92e-26	-0.419016	1.67e-15	0.847758	1.27e-92
MFAP4	blue	-0.77628	6.66e-68	-0.41949	1.54e-15	0.8451	1.73e-91
SHISAL1	blue	-0.544908	5.44e-27	-0.33214	5.77e-10	0.844512	3.07e-91
PDZRN3	blue	-0.599261	1.2e-33	-0.376937	1.29e-12	0.844373	3.52e-91
INKA2	blue	-0.600267	8.77e-34	-0.407588	1.12e-14	0.844343	3.62e-91
NOVA1	blue	-0.596859	2.51e-33	-0.461947	6.69e-19	0.843239	1.05e-90
RAI2	blue	-0.709653	5.67e-52	-0.447844	9.88e-18	0.840898	9.79e-90
C3orf18	blue	-0.643375	4.57e-40	-0.47417	5.86e-20	0.840213	1.87e-89
HOXA4	blue	-0.613687	1.23e-35	-0.434569	1.11e-16	0.840182	1.92e-89
FAXC	blue	-0.509439	2.93e-23	-0.427014	4.22e-16	0.838875	6.54e-89
CLMP	blue	-0.695782	3.27e-49	-0.416769	2.44e-15	0.837774	1.82e-88
CASQ1	blue	-0.52116	1.91e-24	-0.395306	7.94e-14	0.83765	2.04e-88
AL132642.1	blue	-0.541795	1.2e-26	-0.435229	9.9e-17	0.837649	2.04e-88
LMO1	blue	-0.507987	4.07e-23	-0.394849	8.53e-14	0.834009	5.69e-87
LINC02106	blue	-0.585316	8.07e-32	-0.421814	1.03e-15	0.833008	1.4e-86
PDE2A	blue	-0.661004	6.15e-43	-0.336247	3.43e-10	0.83226	2.73e-86
ZNF135	blue	-0.713481	9.19e-53	-0.445017	1.67e-17	0.831002	8.35e-86
PLIN4	blue	-0.546133	3.97e-27	-0.294846	4.6e-08	0.829671	2.7e-85
MORN5	blue	-0.506839	5.29e-23	-0.395976	7.15e-14	0.827444	1.88e-84
PNCK	blue	-0.512063	1.6e-23	-0.386637	3.03e-13	0.826421	4.53e-84
MAPK10	blue	-0.726961	1.18e-55	-0.323632	1.65e-09	0.825886	7.16e-84
BEND5	blue	-0.634116	1.24e-38	-0.513857	1.06e-23	0.825439	1.05e-83
AC010478.1	blue	-0.650814	2.96e-41	-0.4056	1.54e-14	0.825023	1.5e-83
ARHGAP10	blue	-0.581188	2.7e-31	-0.414449	3.59e-15	0.824642	2.07e-83
PKMP3	blue	-0.570372	5.89e-30	-0.440113	4.1e-17	0.823875	3.96e-83
CARMN	blue	-0.564373	3.1e-29	-0.415489	3.02e-15	0.823865	3.99e-83
PPP1R14A	blue	-0.598674	1.44e-33	-0.426517	4.6e-16	0.823524	5.33e-83
APBB1	blue	-0.66144	5.2e-43	-0.449565	7.16e-18	0.822708	1.06e-82
MAMDC2	blue	-0.566081	1.94e-29	-0.426263	4.81e-16	0.822223	1.59e-82
MBNL1-AS1	blue	-0.53832	2.9e-26	-0.395416	7.81e-14	0.822149	1.69e-82
MEIS1	blue	-0.652862	1.38e-41	-0.453475	3.42e-18	0.820892	4.81e-82
A2M-AS1	blue	-0.583134	1.53e-31	-0.430142	2.44e-16	0.820083	9.39e-82
CC2D2A	blue	-0.665982	8.77e-44	-0.388897	2.14e-13	0.819383	1.67e-81
ADAMTSL3	blue	-0.687023	1.51e-47	-0.34262	1.51e-10	0.81912	2.07e-81
ABI3BP	blue	-0.654973	6.21e-42	-0.407617	1.11e-14	0.81879	2.72e-81
DSTN	blue	-0.525162	7.35e-25	-0.351594	4.58e-11	0.818068	4.9e-81
SMOC2	blue	-0.605657	1.62e-34	-0.366647	5.71e-12	0.817761	6.3e-81
ATP1B2	blue	-0.649754	4.4e-41	-0.402984	2.35e-14	0.81757	7.35e-81
PART1	blue	-0.524594	8.43e-25	-0.400132	3.71e-14	0.816409	1.88e-80
CNRIP1	blue	-0.820343	7.58e-82	-0.402859	2.4e-14	0.816067	2.48e-80
PGM5-AS1	blue	-0.520448	2.26e-24	-0.436283	8.19e-17	0.814717	7.32e-80
AC084880.1	blue	-0.51789	4.14e-24	-0.385956	3.36e-13	0.81459	8.1e-80
RHOB	blue	-0.613238	1.43e-35	-0.359178	1.63e-11	0.812523	4.17e-79
MICU3	blue	-0.712752	1.3e-52	-0.457265	1.66e-18	0.811629	8.42e-79
AC053503.4	blue	-0.537782	3.32e-26	-0.396138	6.97e-14	0.81107	1.3e-78
NAP1L2	blue	-0.566028	1.97e-29	-0.43314	1.44e-16	0.810923	1.46e-78
GYPC	blue	-0.744088	1.38e-59	-0.478732	2.3e-20	0.80913	5.88e-78
GPM6B	blue	-0.561462	6.87e-29	-0.381475	6.59e-13	0.808565	9.09e-78
LINC01081	blue	-0.62822	9.59e-38	-0.399669	3.99e-14	0.808347	1.07e-77
LGI4	blue	-0.67944	3.72e-46	-0.38396	4.54e-13	0.806204	5.52e-77
DTNA	blue	-0.528699	3.13e-25	-0.370704	3.2e-12	0.805995	6.47e-77
WNT9A	blue	-0.543645	7.52e-27	-0.333014	5.17e-10	0.80582	7.39e-77
NFASC	blue	-0.574356	1.92e-30	-0.380072	8.12e-13	0.803846	3.27e-76
SOBP	blue	-0.563528	3.91e-29	-0.386968	2.88e-13	0.8022	1.11e-75
NR2F1-AS1	blue	-0.736318	9.15e-58	-0.468278	1.92e-19	0.8018	1.5e-75
PLP1	blue	-0.571259	4.6e-30	-0.323297	1.72e-09	0.801638	1.69e-75
PKIG	blue	-0.66373	2.13e-43	-0.471677	9.7e-20	0.800742	3.27e-75
