# Supplementary material for: Bioinformatics Analysis Reveals an Association Between Cancer Cell Stemness, Gene Mutations, and the Immune Microenvironment in Stomach Adenocarcinoma
Source: Front Genet. 2020 Dec 11;11:595477. doi: 10.3389/fgene.2020.595477 (PMC7759681; doi:10.3389/fgene.2020.595477)
Supplement: Supplementary file 9 [file Table_9.XLSX]

## Sheet: Sheet1
Supplementary table 9: The correlation analysis between the expression of genes in prognostic signatures and copy number variation (CNV).
id	TCGA-VQ-A8PC-01A	TCGA-BR-8487-01A	TCGA-BR-8678-01A	TCGA-FP-8631-01A	TCGA-BR-8588-01A	TCGA-BR-8679-01A	TCGA-HU-8602-01A	TCGA-BR-8589-01A	TCGA-BR-8680-01A	TCGA-HU-8604-01A	TCGA-BR-8590-01A	TCGA-BR-8682-01A	TCGA-HU-8608-01A	TCGA-BR-8591-01A	TCGA-BR-8683-01A	TCGA-HU-8610-01A	TCGA-BR-8484-01A	TCGA-BR-8592-01A	TCGA-BR-8686-01A	TCGA-IN-8663-01A	TCGA-BR-8485-01A	TCGA-BR-8676-01A	TCGA-BR-8687-01A	TCGA-BR-8486-01A	TCGA-BR-8677-01A	TCGA-BR-8690-01A	TCGA-CD-A486-01A	TCGA-HU-A4G3-01A	TCGA-CD-A487-01A	TCGA-VQ-A924-01A	TCGA-VQ-A94R-01A	TCGA-VQ-A91D-01A	TCGA-VQ-AA6D-01A	TCGA-VQ-A91V-01A	TCGA-RD-A8N5-01A	TCGA-R5-A805-01A	TCGA-RD-A8MW-01A	TCGA-RD-A8N4-01A	TCGA-VQ-A8P3-01A	TCGA-VQ-A8P2-01A	TCGA-RD-A8N6-01A	TCGA-RD-A8MV-01A	TCGA-VQ-A8DT-01A	TCGA-RD-A8N0-01A	TCGA-ZA-A8F6-01A	TCGA-VQ-A8DU-01A	TCGA-RD-A8N1-01A	TCGA-FP-A8CX-01A	TCGA-RD-A8N2-01A
CCDC15|cnv	0	0	0	0	0	0	0	0	0	0	0	0	0	0	0	0	0	0	0	0	0	0	0	0	0	0	0	0	0	0	0	0	0	1	0	0	0	0	0	0	0	0	0	0	0	0	0	0	0
CPZ|cnv	0	0	0	0	0	0	0	0	0	0	0	0	0	0	0	0	0	0	0	1	0	0	0	0	0	0	0	0	0	0	0	0	0	0	0	0	0	0	0	0	0	0	0	0	0	0	0	1	0
DNASE1L2|cnv	0	0	0	1	0	0	0	0	0	0	0	0	0	0	0	0	0	0	0	0	0	0	0	0	0	0	0	0	0	0	0	0	0	0	0	0	0	0	0	0	0	0	0	0	0	0	0	0	0
NUDT10|cnv	0	0	0	0	0	0	0	0	-1	0	0	0	0	0	0	0	0	0	0	0	0	0	0	0	0	0	0	0	0	0	0	0	0	0	0	0	0	0	0	0	0	0	0	0	0	0	0	-1	0
PASK|cnv	0	0	0	0	0	0	0	0	0	0	0	0	0	0	0	0	0	0	0	0	-1	0	0	0	0	0	-1	0	0	0	0	0	0	0	0	1	0	0	0	0	0	0	0	0	0	-1	0	0	0
PLCL1|cnv	0	0	0	0	0	0	0	0	0	0	0	0	0	0	0	0	0	0	0	0	0	0	0	0	0	0	0	0	1	0	0	0	0	0	0	0	0	0	0	0	0	0	0	0	0	0	0	0	0
PRR5-ARHGAP8|cnv	0	0	0	0	0	0	0	0	0	0	0	0	0	0	-1	0	0	0	0	0	0	0	0	0	0	0	0	0	0	0	0	0	0	0	0	0	0	0	0	0	0	0	0	0	0	0	0	0	0
SYCE2|cnv	0	0	0	1	0	0	0	0	0	0	0	0	0	0	0	0	0	0	0	0	0	0	0	0	0	0	0	0	0	0	0	0	0	0	0	-1	0	0	-1	0	0	0	0	0	0	0	0	0	0
CCDC15|exp	0.179945	0.074003	0.0927654	0.180483	0.700435	0.292292	0.096997	0.0811123	0.741061	0.679341	0.652239	0.826743	0.0118757	0.235148	0.602417	0.0518388	0.137033	1.24734	0.396026	0.024737	0.206515	0.126913	0.0854501	0.365261	0.50639	0.240768	0.0958936	0.159633	0.461154	0.126244	0.316354	0.0327764	0.0736348	0.0277228	0.408284	0.180722	0.258583	0.835303	0.365255	0.0260208	0.880385	0.175881	0.118195	0.70222	1.35207	0.541892	0.52965	0.122131	0.753037
CPZ|exp	0.18017	0.189638	0.181039	0.631767	0.650878	0.397652	0.0807896	0.0302215	0.343374	0.168348	0.723275	0.449227	0.315829	0.253093	0.543383	0.163214	0.328035	0.932545	0.675179	2.56372	0.609529	0	0.874863	0.225074	0.667542	0.225547	0.34928	0.0615764	0.256072	0.0958992	0.49312	0.104985	0.0728399	0.0470375	0.736888	0.107579	0.421339	0.0396095	0.268665	0.121789	0.223186	0.288616	0.0504247	0.653302	0.246543	0.222243	0.550854	0.0626503	0.300429
DNASE1L2|exp	0.366128	0.662353	0.349037	0.167773	0.144541	0.361678	0.260565	0.314865	0.847308	0.453615	0.182781	0.286227	0.430307	0.532184	0.442864	0.761681	0.112879	0.201653	0.738032	0.687052	0.215586	0.492065	0.25337	0.266851	0.623139	0	0.601661	0.62514	0.274752	0.622855	0.794974	0.493604	0.608941	0.705408	0.0545043	0.148111	0.401557	0.205473	0.604094	0.792973	0.0698341	0.488828	0.291055	0.337285	0.158021	0.126887	0.21702	0.573479	0.0196671
NUDT10|exp	0.169598	0.0664676	0.0194862	0.195224	0.591228	0.113617	0.0173266	0	0.12245	0.182707	0.619068	0.536826	0.0226108	0.152372	0.199831	0	0.111995	1.19677	0.132297	0.10823	0.119131	0.0868149	0.225133	0.0512624	0.609519	0.360627	0.298481	0.0770839	0.660458	0.0737231	0.219869	0.165569	0.0337949	0.086508	0.188819	0.129393	0.248018	1.19564	0.0415727	0	0.657588	0.128183	0.0340425	0.331	0.558523	0.021633	0.230689	0.113608	1.22743
PASK|exp	1.46227	1.09401	2.10913	1.50113	1.19708	1.79184	1.99179	1.5577	1.56768	1.64524	1.14036	1.15279	2.23813	1.45496	1.15183	1.95017	1.72296	1.00252	2.05541	1.62488	1.41857	1.25993	0.830198	1.41485	1.06991	0.877337	1.303	1.12146	0.974685	1.9058	2.3492	1.50381	1.68236	0.843707	0.740153	1.36206	1.22588	0.571421	1.28021	1.43641	1.18192	1.4765	1.15926	1.5701	0.84773	0.864226	1.7496	1.33612	0.38489
PLCL1|exp	0.59127	0.249193	0.391738	0.352629	0.856228	0.667296	0.446108	0.379077	0.173745	0.451412	1.15256	1.25774	1.11512	0.634175	1.43941	0.862109	0.915758	1.31804	1.14161	1.12434	0.70142	0.623446	0.742052	0.976267	1.07343	0.428437	1.17435	0.563968	0.678536	0.280991	0.713243	0.184444	0.261188	0.262544	0.708968	0.742844	0.706368	1.53203	0.457147	0.244885	1.06568	0.494906	0.182249	1.03679	1.28977	1.70901	0.789467	0.367599	1.83843
PRR5-ARHGAP8|exp	0.195684	0.231272	0.416088	0.332364	0.237217	0.450909	0.241147	0.327377	0.364081	0.268141	0.375941	0.249012	0.437603	0.189959	0.22799	0.59994	0.401159	0.0845559	0.707003	0.177067	0.220738	0.0931666	0.0421628	0.489401	0.181395	0.249848	0.261163	0.215569	0.263425	0.556264	0.60915	0.0786859	0.27935	0.250844	0.112213	0.330325	0.152259	0.0205627	0.265605	0.174099	0.485922	0.215289	0.136264	0.144913	0.237326	0.416052	0.57093	0.0771506	0.0447964
SYCE2|exp	0.26722	0.769	0.447829	0.98809	0.244892	0.531306	2.50178	1.39774	0.796939	2.30326	0.431285	0.172499	0.519981	0.364805	0.294824	0.345815	0.305896	0.447952	0.71178	0.201207	0.295581	1.97347	0.183906	0.610283	0.607755	0.4855	0.525519	0.310977	1.12211	0.558474	0.372244	0.645174	0.648585	0.143354	0.560806	0.326781	0.327846	0.428138	0.66621	1.40134	0.5778	0.453013	0.445307	0.363158	0.140731	0.478969	0.687677	0.299648	0.530137
[truncated: 324 more columns]
